# Supplementary material
Source: Elsevier journal article supplement (https://www.sciencedirect.com/science/article/pii/S0021755721000280)
Supplement: mmc1 [file S0021755721000280:mmc1.pdf]

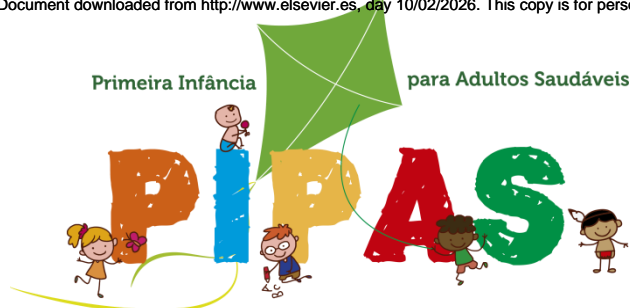

# FORMULÁRIO DE DESENVOLVIMENTO INFANTIL

## PARTE 1

| I - DADOS GERAIS                                                                                                             |                                                                                                                                                                                                                                                                                                                                                                                                                                                                                                                                                                                                                                                                                                                                                                                                                                                                                                                                                                                                                                                                                                                                                                                                                                                                                                                                                                                                                                                                                                                                         |
|------------------------------------------------------------------------------------------------------------------------------|-----------------------------------------------------------------------------------------------------------------------------------------------------------------------------------------------------------------------------------------------------------------------------------------------------------------------------------------------------------------------------------------------------------------------------------------------------------------------------------------------------------------------------------------------------------------------------------------------------------------------------------------------------------------------------------------------------------------------------------------------------------------------------------------------------------------------------------------------------------------------------------------------------------------------------------------------------------------------------------------------------------------------------------------------------------------------------------------------------------------------------------------------------------------------------------------------------------------------------------------------------------------------------------------------------------------------------------------------------------------------------------------------------------------------------------------------------------------------------------------------------------------------------------------|
| Vamos conversar sobre os seus dados e os da criança                                                                          |                                                                                                                                                                                                                                                                                                                                                                                                                                                                                                                                                                                                                                                                                                                                                                                                                                                                                                                                                                                                                                                                                                                                                                                                                                                                                                                                                                                                                                                                                                                                         |
| 1. Município:                                                                                                                | <input type="checkbox"/> Embu das Artes <input type="checkbox"/> Recife <input type="checkbox"/> Brasília                                                                                                                                                                                                                                                                                                                                                                                                                                                                                                                                                                                                                                                                                                                                                                                                                                                                                                                                                                                                                                                                                                                                                                                                                                                                                                                                                                                                                               |
| 2. Nome da UBS                                                                                                               |                                                                                                                                                                                                                                                                                                                                                                                                                                                                                                                                                                                                                                                                                                                                                                                                                                                                                                                                                                                                                                                                                                                                                                                                                                                                                                                                                                                                                                                                                                                                         |
| 3. Data da entrevista:                                                                                                       | ___/___/___                                                                                                                                                                                                                                                                                                                                                                                                                                                                                                                                                                                                                                                                                                                                                                                                                                                                                                                                                                                                                                                                                                                                                                                                                                                                                                                                                                                                                                                                                                                             |
| 4. O que é da criança                                                                                                        | <input type="checkbox"/> Mãe <input type="checkbox"/> Pai <input type="checkbox"/> Avó <input type="checkbox"/> Outros _____                                                                                                                                                                                                                                                                                                                                                                                                                                                                                                                                                                                                                                                                                                                                                                                                                                                                                                                                                                                                                                                                                                                                                                                                                                                                                                                                                                                                            |
| 5. Qual o seu nome (primeiro nome):                                                                                          |                                                                                                                                                                                                                                                                                                                                                                                                                                                                                                                                                                                                                                                                                                                                                                                                                                                                                                                                                                                                                                                                                                                                                                                                                                                                                                                                                                                                                                                                                                                                         |
| 6. Qual o nome da Criança (primeiro nome):                                                                                   |                                                                                                                                                                                                                                                                                                                                                                                                                                                                                                                                                                                                                                                                                                                                                                                                                                                                                                                                                                                                                                                                                                                                                                                                                                                                                                                                                                                                                                                                                                                                         |
| 7. Data de nascimento da criança:                                                                                            | ___/___/___ <b>FORMULÁRIO PARTE 2:</b> _____                                                                                                                                                                                                                                                                                                                                                                                                                                                                                                                                                                                                                                                                                                                                                                                                                                                                                                                                                                                                                                                                                                                                                                                                                                                                                                                                                                                                                                                                                            |
| 8. Sexo da criança                                                                                                           | <input type="checkbox"/> Feminino <input type="checkbox"/> Masculino                                                                                                                                                                                                                                                                                                                                                                                                                                                                                                                                                                                                                                                                                                                                                                                                                                                                                                                                                                                                                                                                                                                                                                                                                                                                                                                                                                                                                                                                    |
| 9. Como você classifica a cor da criança?                                                                                    | <input type="checkbox"/> Branca <input type="checkbox"/> Preta <input type="checkbox"/> Parda <input type="checkbox"/> Amarela <input type="checkbox"/> Indígena <input type="checkbox"/> Não sei                                                                                                                                                                                                                                                                                                                                                                                                                                                                                                                                                                                                                                                                                                                                                                                                                                                                                                                                                                                                                                                                                                                                                                                                                                                                                                                                       |
| 10. Endereço:                                                                                                                |                                                                                                                                                                                                                                                                                                                                                                                                                                                                                                                                                                                                                                                                                                                                                                                                                                                                                                                                                                                                                                                                                                                                                                                                                                                                                                                                                                                                                                                                                                                                         |
| 11. Telefones (anotar telefone fixo, celular e de contato, se possível)                                                      |                                                                                                                                                                                                                                                                                                                                                                                                                                                                                                                                                                                                                                                                                                                                                                                                                                                                                                                                                                                                                                                                                                                                                                                                                                                                                                                                                                                                                                                                                                                                         |
| II - DADOS SOBRE A CRIANÇA                                                                                                   |                                                                                                                                                                                                                                                                                                                                                                                                                                                                                                                                                                                                                                                                                                                                                                                                                                                                                                                                                                                                                                                                                                                                                                                                                                                                                                                                                                                                                                                                                                                                         |
| Quero fazer algumas perguntas sobre a criança                                                                                |                                                                                                                                                                                                                                                                                                                                                                                                                                                                                                                                                                                                                                                                                                                                                                                                                                                                                                                                                                                                                                                                                                                                                                                                                                                                                                                                                                                                                                                                                                                                         |
| 12. A mãe da criança fez pré-natal?                                                                                          | <input type="checkbox"/> Sim <input type="checkbox"/> Não <input type="checkbox"/> Não sei<br>(Se respondeu "não" ou "não sei", vá para questão 14)                                                                                                                                                                                                                                                                                                                                                                                                                                                                                                                                                                                                                                                                                                                                                                                                                                                                                                                                                                                                                                                                                                                                                                                                                                                                                                                                                                                     |
| 13. Quantas consultas?                                                                                                       | <input type="checkbox"/> 1 a 3 <input type="checkbox"/> 4 a 6 <input type="checkbox"/> 7 ou + <input type="checkbox"/> Não lembro <input type="checkbox"/> Não sei                                                                                                                                                                                                                                                                                                                                                                                                                                                                                                                                                                                                                                                                                                                                                                                                                                                                                                                                                                                                                                                                                                                                                                                                                                                                                                                                                                      |
| 14. Qual o tipo de parto?                                                                                                    | <input type="checkbox"/> Vaginal <input type="checkbox"/> Cesárea <input type="checkbox"/> Fórceps <input type="checkbox"/> Ignorado <input type="checkbox"/> Não sei                                                                                                                                                                                                                                                                                                                                                                                                                                                                                                                                                                                                                                                                                                                                                                                                                                                                                                                                                                                                                                                                                                                                                                                                                                                                                                                                                                   |
| 15. Foi prematuro?                                                                                                           | <input type="checkbox"/> Sim <input type="checkbox"/> Não <input type="checkbox"/> Não sei<br>(Se respondeu "não" ou "não sei", pule para a questão 17)                                                                                                                                                                                                                                                                                                                                                                                                                                                                                                                                                                                                                                                                                                                                                                                                                                                                                                                                                                                                                                                                                                                                                                                                                                                                                                                                                                                 |
| 16. Se sim, quantos meses?                                                                                                   | ___ meses <input type="checkbox"/> semanas (assinale meses ou semanas) <input type="checkbox"/> Não sei                                                                                                                                                                                                                                                                                                                                                                                                                                                                                                                                                                                                                                                                                                                                                                                                                                                                                                                                                                                                                                                                                                                                                                                                                                                                                                                                                                                                                                 |
| 17. Qual o peso de nascimento do bebê?                                                                                       | ___ gramas <input type="checkbox"/> Não lembro <input type="checkbox"/> Não sei                                                                                                                                                                                                                                                                                                                                                                                                                                                                                                                                                                                                                                                                                                                                                                                                                                                                                                                                                                                                                                                                                                                                                                                                                                                                                                                                                                                                                                                         |
| 18. A criança teve algum problema ao nascimento?                                                                             | <input type="checkbox"/> Sim <input type="checkbox"/> Não <input type="checkbox"/> Não lembro <input type="checkbox"/> Não sei<br>(Se respondeu "não" ou "não sei", pule para a questão 20)                                                                                                                                                                                                                                                                                                                                                                                                                                                                                                                                                                                                                                                                                                                                                                                                                                                                                                                                                                                                                                                                                                                                                                                                                                                                                                                                             |
| 19. Se sim, qual?                                                                                                            |                                                                                                                                                                                                                                                                                                                                                                                                                                                                                                                                                                                                                                                                                                                                                                                                                                                                                                                                                                                                                                                                                                                                                                                                                                                                                                                                                                                                                                                                                                                                         |
| 20. A criança ficou em contato pele a pele sobre o corpo da mãe logo após o nascimento?                                      | <input type="checkbox"/> Sim <input type="checkbox"/> Não <input type="checkbox"/> Não lembro <input type="checkbox"/> Não sei                                                                                                                                                                                                                                                                                                                                                                                                                                                                                                                                                                                                                                                                                                                                                                                                                                                                                                                                                                                                                                                                                                                                                                                                                                                                                                                                                                                                          |
| 21. Foi amamentado na primeira hora de vida?                                                                                 | <input type="checkbox"/> Sim <input type="checkbox"/> Não <input type="checkbox"/> Não lembro <input type="checkbox"/> Não sei                                                                                                                                                                                                                                                                                                                                                                                                                                                                                                                                                                                                                                                                                                                                                                                                                                                                                                                                                                                                                                                                                                                                                                                                                                                                                                                                                                                                          |
| 22. Ele ainda mama no peito?                                                                                                 | <input type="checkbox"/> Sim <input type="checkbox"/> Não <input type="checkbox"/> Nunca mamou <input type="checkbox"/> Não sei<br>(Se respondeu "nunca mamou", pule para a questão 25)                                                                                                                                                                                                                                                                                                                                                                                                                                                                                                                                                                                                                                                                                                                                                                                                                                                                                                                                                                                                                                                                                                                                                                                                                                                                                                                                                 |
| 23. Até quando ele mamou no peito?                                                                                           | ___ dias <input type="checkbox"/> meses (assinalar dias ou meses) <input type="checkbox"/> Não sei                                                                                                                                                                                                                                                                                                                                                                                                                                                                                                                                                                                                                                                                                                                                                                                                                                                                                                                                                                                                                                                                                                                                                                                                                                                                                                                                                                                                                                      |
| 24. Até quando ele mamou somente no peito, sem água, chá ou outros líquidos?                                                 | ___ dias <input type="checkbox"/> meses (assinalar dias ou meses) <input type="checkbox"/> Não sei                                                                                                                                                                                                                                                                                                                                                                                                                                                                                                                                                                                                                                                                                                                                                                                                                                                                                                                                                                                                                                                                                                                                                                                                                                                                                                                                                                                                                                      |
| 25. Desde ontem de manhã até hoje de manhã, o que seu filho comeu? Eu vou perguntar os alimentos e você responde sim ou não: | a. leite <input type="checkbox"/> Sim <input type="checkbox"/> Não <input type="checkbox"/> Não sei<br>b. água/chá <input type="checkbox"/> Sim <input type="checkbox"/> Não <input type="checkbox"/> Não sei<br>c. suco natural <input type="checkbox"/> Sim <input type="checkbox"/> Não <input type="checkbox"/> Não sei<br>d. carnes/ovos <input type="checkbox"/> Sim <input type="checkbox"/> Não <input type="checkbox"/> Não sei<br>e. legumes <input type="checkbox"/> Sim <input type="checkbox"/> Não <input type="checkbox"/> Não sei<br>f. verduras <input type="checkbox"/> Sim <input type="checkbox"/> Não <input type="checkbox"/> Não sei<br>g. frutas <input type="checkbox"/> Sim <input type="checkbox"/> Não <input type="checkbox"/> Não sei<br>h. arroz/batata/mandioca /macarrão <input type="checkbox"/> Sim <input type="checkbox"/> Não <input type="checkbox"/> Não sei<br>i. feijão/lentilha <input type="checkbox"/> Sim <input type="checkbox"/> Não <input type="checkbox"/> Não sei<br>j. refrigerante <input type="checkbox"/> Sim <input type="checkbox"/> Não <input type="checkbox"/> Não sei<br>k. biscoito salgado/doce <input type="checkbox"/> Sim <input type="checkbox"/> Não <input type="checkbox"/> Não sei<br>l. salgadinho de pacote <input type="checkbox"/> Sim <input type="checkbox"/> Não <input type="checkbox"/> Não sei<br>m. bala/pirulito/chocolate/guloseimas <input type="checkbox"/> Sim <input type="checkbox"/> Não <input type="checkbox"/> Não sei<br>n. outros _____ |
| 26. A criança recebeu visita domiciliar de algum profissional da saúde na 1ª semana de vida?                                 | <input type="checkbox"/> Sim <input type="checkbox"/> Não <input type="checkbox"/> Não lembro <input type="checkbox"/> Não sei                                                                                                                                                                                                                                                                                                                                                                                                                                                                                                                                                                                                                                                                                                                                                                                                                                                                                                                                                                                                                                                                                                                                                                                                                                                                                                                                                                                                          |

|                                                                                                                                                          |                                                                                                                                                                                                                                                                                                                                                                                         |
|----------------------------------------------------------------------------------------------------------------------------------------------------------|-----------------------------------------------------------------------------------------------------------------------------------------------------------------------------------------------------------------------------------------------------------------------------------------------------------------------------------------------------------------------------------------|
| 27. A criança possui a caderneta da criança?                                                                                                             | <input type="checkbox"/> Sim e leu <input type="checkbox"/> Sim, leu em partes <input type="checkbox"/> Não possui <input type="checkbox"/> Não lembro<br><input type="checkbox"/> Não sei                                                                                                                                                                                              |
| 28. A criança costuma ter consultas agendadas para acompanhamento?                                                                                       | <input type="checkbox"/> Sim <input type="checkbox"/> Não <input type="checkbox"/> Não sei<br><b>(Se respondeu “não” ou “não sei”, vá para a questão 30)</b>                                                                                                                                                                                                                            |
| 29. Onde a criança tem a maioria das consultas agendadas?                                                                                                | <input type="checkbox"/> UBS <input type="checkbox"/> Saúde da Família <input type="checkbox"/> Serviço particular/convênio <input type="checkbox"/> Não sei                                                                                                                                                                                                                            |
| 30. Quando foi a última vez que a criança foi a uma consulta?                                                                                            | <input type="checkbox"/> último mês <input type="checkbox"/> 1-3 me <input type="checkbox"/> 4-6 me <input type="checkbox"/> 6-12 me <input type="checkbox"/> > 12 me <input type="checkbox"/> Não sei                                                                                                                                                                                  |
| 31. A criança frequenta creche/escolinha/educação infantil?                                                                                              | <input type="checkbox"/> Sim <input type="checkbox"/> Não <input type="checkbox"/> Não sei<br><b>(Se respondeu “não” ou “não sei”, pular para questão 35)</b>                                                                                                                                                                                                                           |
| 32. Que tipo de creche/escolinha/educação infantil?                                                                                                      | <input type="checkbox"/> Pública/Filantrópica <input type="checkbox"/> Privada <input type="checkbox"/> Não sei                                                                                                                                                                                                                                                                         |
| 33. Desde que idade?                                                                                                                                     | _____ <input type="checkbox"/> meses <input type="checkbox"/> anos <input type="checkbox"/> Não sei (assinalar meses ou anos)                                                                                                                                                                                                                                                           |
| 34. Em quais períodos?                                                                                                                                   | <input type="checkbox"/> de manhã <input type="checkbox"/> à tarde <input type="checkbox"/> manhã + tarde <input type="checkbox"/> Não sei                                                                                                                                                                                                                                              |
| 35. Se não, por quê?                                                                                                                                     | <input type="checkbox"/> não quer colocar na creche <input type="checkbox"/> não tem vaga/ não pode pagar<br><input type="checkbox"/> Não sei                                                                                                                                                                                                                                           |
| <b>III - DADOS DA FAMÍLIA</b><br>Agora vou fazer perguntas sobre a família                                                                               |                                                                                                                                                                                                                                                                                                                                                                                         |
| 36. Participa de algum programa social, tipo Bolsa Família ou Benefício de Prestação Continuada?                                                         | <input type="checkbox"/> Sim <input type="checkbox"/> Não <input type="checkbox"/> Não sei<br><b>(Se respondeu “não” ou “não sei”, pule para a questão 38)</b>                                                                                                                                                                                                                          |
| 37. Qual?                                                                                                                                                |                                                                                                                                                                                                                                                                                                                                                                                         |
| 38. Quem é o chefe da família?                                                                                                                           | <input type="checkbox"/> O pai da criança <input type="checkbox"/> A mãe da criança<br><input type="checkbox"/> Outro _____ (quem)                                                                                                                                                                                                                                                      |
| 39. Qual é a escolaridade do pai da criança?                                                                                                             | <input type="checkbox"/> Analfabeto <input type="checkbox"/> Fundamental incompleto <input type="checkbox"/> Fundamental I completo/ Fundamental II incompleto <input type="checkbox"/> Fundamental II completo/ Médio incompleto <input type="checkbox"/> Médio completo/Superior incompleto<br><input type="checkbox"/> Superior completo <input type="checkbox"/> Não sei/não lembro |
| 40. Qual a escolaridade da mãe da criança?                                                                                                               | <input type="checkbox"/> Analfabeta <input type="checkbox"/> Fundamental incompleto <input type="checkbox"/> Fundamental I completo/ Fundamental II incompleto <input type="checkbox"/> Fundamental II completo/ Médio incompleto <input type="checkbox"/> Médio completo/Superior incompleto<br><input type="checkbox"/> Superior completo <input type="checkbox"/> Não sei/não lembro |
| 41. Qual é a escolaridade do chefe de família? (caso não seja nem o pai, nem a mãe)                                                                      | <input type="checkbox"/> Analfabeto <input type="checkbox"/> Fundamental incompleto <input type="checkbox"/> Fundamental I completo/ Fundamental II incompleto <input type="checkbox"/> Fundamental II completo/ Médio incompleto <input type="checkbox"/> Médio completo/Superior incompleto<br><input type="checkbox"/> Superior completo <input type="checkbox"/> Não sei/não lembro |
| 42. O chefe da família está:                                                                                                                             | <input type="checkbox"/> Empregado <input type="checkbox"/> Desempregado <input type="checkbox"/> Aposentado                                                                                                                                                                                                                                                                            |
| 43. A mãe da criança está:                                                                                                                               | <input type="checkbox"/> Empregada <input type="checkbox"/> Desempregada <input type="checkbox"/> Aposentada                                                                                                                                                                                                                                                                            |
| 44. A mãe da criança trabalha fora quantas vezes por semana?                                                                                             | <input type="checkbox"/> até 3 vezes <input type="checkbox"/> 4 a 6 vezes <input type="checkbox"/> Todos os dias <input type="checkbox"/> Licença maternidade                                                                                                                                                                                                                           |
| 45. Quando a criança nasceu a mãe teve direito a licença maternidade?                                                                                    | <input type="checkbox"/> Sim 4 meses <input type="checkbox"/> Sim 6 meses <input type="checkbox"/> Não <input type="checkbox"/> Não estava trabalhando<br><input type="checkbox"/> Não sabe                                                                                                                                                                                             |
| 46. Qual a idade da mãe da criança?                                                                                                                      |                                                                                                                                                                                                                                                                                                                                                                                         |
| 47. Algum profissional da saúde deu diagnóstico de depressão para a mãe da criança?                                                                      | <input type="checkbox"/> Sim <input type="checkbox"/> Não <input type="checkbox"/> Não sei                                                                                                                                                                                                                                                                                              |
| 48. A criança convive com pessoas que fazem uso de álcool ou droga?                                                                                      | <input type="checkbox"/> Sim <input type="checkbox"/> Não <input type="checkbox"/> Não sei                                                                                                                                                                                                                                                                                              |
| 49. A mãe fez uso de bebida alcoólica durante a gestação?                                                                                                | <input type="checkbox"/> Sim <input type="checkbox"/> Não <input type="checkbox"/> Não sei                                                                                                                                                                                                                                                                                              |
| 50. A mãe fumou durante a gestação da criança?                                                                                                           | <input type="checkbox"/> Sim <input type="checkbox"/> Não <input type="checkbox"/> Não sei                                                                                                                                                                                                                                                                                              |
| Queremos, agora, conhecer alguns dados sobre a casa em que a criança mora                                                                                |                                                                                                                                                                                                                                                                                                                                                                                         |
| 51. A casa possui banheiros? (Não considerar banheiros coletivos)                                                                                        | <input type="checkbox"/> 0 <input type="checkbox"/> 1 <input type="checkbox"/> 2 <input type="checkbox"/> 3 <input type="checkbox"/> 4ou+                                                                                                                                                                                                                                               |
| 52. Possui empregados domésticos? (Considerar apenas mensalistas que trabalham pelo menos cinco dias por semana – Não considerar diaristas e faxineiras) | <input type="checkbox"/> 0 <input type="checkbox"/> 1 <input type="checkbox"/> 2 <input type="checkbox"/> 3 <input type="checkbox"/> 4ou+                                                                                                                                                                                                                                               |
| 53. Possui automóveis?                                                                                                                                   | <input type="checkbox"/> 0 <input type="checkbox"/> 1 <input type="checkbox"/> 2 <input type="checkbox"/> 3 <input type="checkbox"/> 4ou+                                                                                                                                                                                                                                               |
| 54. Possui microcomputador?                                                                                                                              | <input type="checkbox"/> 0 <input type="checkbox"/> 1 <input type="checkbox"/> 2 <input type="checkbox"/> 3 <input type="checkbox"/> 4ou+                                                                                                                                                                                                                                               |
| 55. Possui máquina lava-louça?                                                                                                                           | <input type="checkbox"/> 0 <input type="checkbox"/> 1 <input type="checkbox"/> 2 <input type="checkbox"/> 3 <input type="checkbox"/> 4ou+                                                                                                                                                                                                                                               |
| 56. Possui geladeira?                                                                                                                                    | <input type="checkbox"/> 0 <input type="checkbox"/> 1 <input type="checkbox"/> 2 <input type="checkbox"/> 3 <input type="checkbox"/> 4ou+                                                                                                                                                                                                                                               |
| 57. Possui freezer?                                                                                                                                      | <input type="checkbox"/> 0 <input type="checkbox"/> 1 <input type="checkbox"/> 2 <input type="checkbox"/> 3 <input type="checkbox"/> 4ou+                                                                                                                                                                                                                                               |
| 58. Possui máquina de lava roupas?                                                                                                                       | <input type="checkbox"/> 0 <input type="checkbox"/> 1 <input type="checkbox"/> 2 <input type="checkbox"/> 3 <input type="checkbox"/> 4ou+                                                                                                                                                                                                                                               |
| 59. Possui aparelho de DVD?                                                                                                                              | <input type="checkbox"/> 0 <input type="checkbox"/> 1 <input type="checkbox"/> 2 <input type="checkbox"/> 3 <input type="checkbox"/> 4ou+                                                                                                                                                                                                                                               |
| 60. Possui micro-ondas?                                                                                                                                  | <input type="checkbox"/> 0 <input type="checkbox"/> 1 <input type="checkbox"/> 2 <input type="checkbox"/> 3 <input type="checkbox"/> 4ou+                                                                                                                                                                                                                                               |
| 61. Possui motocicleta?                                                                                                                                  | <input type="checkbox"/> 0 <input type="checkbox"/> 1 <input type="checkbox"/> 2 <input type="checkbox"/> 3 <input type="checkbox"/> 4ou+                                                                                                                                                                                                                                               |
| 62. Possui secadora de roupa?                                                                                                                            | <input type="checkbox"/> 0 <input type="checkbox"/> 1 <input type="checkbox"/> 2 <input type="checkbox"/> 3 <input type="checkbox"/> 4ou+                                                                                                                                                                                                                                               |

|                                                                                                                                                                                                      |                                                                                                                                                                                                                                                                                                                                                                                                                                                                            |
|------------------------------------------------------------------------------------------------------------------------------------------------------------------------------------------------------|----------------------------------------------------------------------------------------------------------------------------------------------------------------------------------------------------------------------------------------------------------------------------------------------------------------------------------------------------------------------------------------------------------------------------------------------------------------------------|
| 63. Possui acesso a internet em casa ou no celular?                                                                                                                                                  | <input type="checkbox"/> Sim <input type="checkbox"/> Não                                                                                                                                                                                                                                                                                                                                                                                                                  |
| 64. Na casa tem água encanada?                                                                                                                                                                       | <input type="checkbox"/> Sim <input type="checkbox"/> Não                                                                                                                                                                                                                                                                                                                                                                                                                  |
| 65. A casa fica em rua asfaltada/pavimentada?                                                                                                                                                        | <input type="checkbox"/> Sim <input type="checkbox"/> Não                                                                                                                                                                                                                                                                                                                                                                                                                  |
| <b>IV - COTIDIANO DA CRIANÇA</b>                                                                                                                                                                     |                                                                                                                                                                                                                                                                                                                                                                                                                                                                            |
| Vamos fazer algumas perguntas sobre o cotidiano da criança e sobre seu desenvolvimento                                                                                                               |                                                                                                                                                                                                                                                                                                                                                                                                                                                                            |
| 66. Quem cuida da criança a maior parte do tempo?                                                                                                                                                    | <input type="checkbox"/> Mãe <input type="checkbox"/> Pai <input type="checkbox"/> Companheiro(a) <input type="checkbox"/> Irmãos da criança <input type="checkbox"/> Avós<br><input type="checkbox"/> Babá <input type="checkbox"/> Outros _____                                                                                                                                                                                                                          |
| 67. A criança fica aos cuidados de outra criança com menos de 10 anos de idade?                                                                                                                      | <input type="checkbox"/> Sim <input type="checkbox"/> Não                                                                                                                                                                                                                                                                                                                                                                                                                  |
| 68. Quantos livros infantis ou livros de imagens a criança tem?                                                                                                                                      | <input type="checkbox"/> Nenhum <input type="checkbox"/> 1-3 <input type="checkbox"/> 4-6 <input type="checkbox"/> 7-9 <input type="checkbox"/> 10 ou mais <input type="checkbox"/> Não sei                                                                                                                                                                                                                                                                                |
| 69. A criança brinca com:<br><b>(ler todas as alternativas)</b>                                                                                                                                      | <input type="checkbox"/> a. brinquedos caseiros (tais como bonecas, carros ou outros brinquedos feitos em casa);<br><input type="checkbox"/> b. brinquedos de uma loja ou brinquedos fabricados;<br><input type="checkbox"/> c. objetos domésticos (como bacias ou vasos) ou objetos encontrados fora (paus, pedras, conchas de animais ou folhas)<br><input type="checkbox"/> d. brinquedos eletrônicos (Smartphones ou tablets)                                          |
| 70. A criança assiste TV? Quantos dias da semana?                                                                                                                                                    | <input type="checkbox"/> Não assiste <input type="checkbox"/> 1 a 3 dias <input type="checkbox"/> 4 a 6 dias <input type="checkbox"/> Todos os dias<br><input type="checkbox"/> Não sei<br><b>(Se respondeu “não assiste” ou “não sei”, pule para a questão 72)</b>                                                                                                                                                                                                        |
| 71. Por quanto tempo ela assiste TV?                                                                                                                                                                 | <input type="checkbox"/> <ou = 2 horas <input type="checkbox"/> > 2 horas <input type="checkbox"/> Não sei                                                                                                                                                                                                                                                                                                                                                                 |
| 72. Na última semana você ou qualquer outro membro da família com 15 anos de idade ou mais se envolveu em qualquer uma das seguintes atividades com a criança:<br><b>(ler todas as alternativas)</b> | <input type="checkbox"/> a. Leu livros ou olhou figuras de livros com a criança?<br><input type="checkbox"/> b. Contou histórias para a criança?<br><input type="checkbox"/> c. Cantou músicas para a criança, ou com sua criança? Incluindo canções de ninar?<br><input type="checkbox"/> d. Levou a criança para passear?<br><input type="checkbox"/> e. Jogou ou brincou com a criança?<br><input type="checkbox"/> f. Nomeou, contou ou desenhou coisas com a criança? |
| <b>V - PERCEPÇÃO SOBRE SAÚDE E DESENVOLVIMENTO DA CRIANÇA</b>                                                                                                                                        |                                                                                                                                                                                                                                                                                                                                                                                                                                                                            |
| 73. A criança tem algum problema de saúde ou no crescimento?                                                                                                                                         | <input type="checkbox"/> Sim <input type="checkbox"/> Não <input type="checkbox"/> Não sei<br><b>(Se respondeu “não” ou “não sei”, pule para a questão 75)</b>                                                                                                                                                                                                                                                                                                             |
| 74. Qual?                                                                                                                                                                                            |                                                                                                                                                                                                                                                                                                                                                                                                                                                                            |
| 75. Considera o desenvolvimento da criança normal para a idade?                                                                                                                                      | <input type="checkbox"/> Sim <input type="checkbox"/> Não <input type="checkbox"/> Não sei                                                                                                                                                                                                                                                                                                                                                                                 |
| 76. Por quê?                                                                                                                                                                                         |                                                                                                                                                                                                                                                                                                                                                                                                                                                                            |
| 77. Recebeu informações sobre desenvolvimento infantil?                                                                                                                                              | <input type="checkbox"/> Não <input type="checkbox"/> No serviço de saúde <input type="checkbox"/> No serviço de educação<br><input type="checkbox"/> No serviço social <input type="checkbox"/> outros _____ <input type="checkbox"/> Não sei                                                                                                                                                                                                                             |

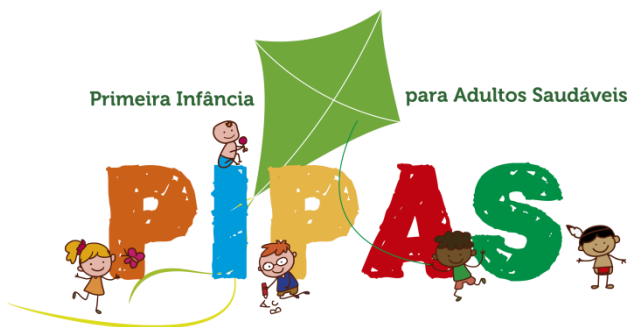

## FORMULÁRIO DE DESENVOLVIMENTO INFANTIL PARTE 2

### FORMULÁRIO A – CRIANÇAS DE 0 A 6 MESES

|                                                                                         |                  |                  |                      |
|-----------------------------------------------------------------------------------------|------------------|------------------|----------------------|
| A1. O bebê, quando deitado de barriga para cima, movimenta os braços e as pernas?       | (   ) <i>Sim</i> | (   ) <i>Não</i> | (   ) <i>Não sei</i> |
| A2. Quando deitado de barriga para baixo o bebê consegue manter a cabeça levantada?     | (   ) <i>Sim</i> | (   ) <i>Não</i> | (   ) <i>Não sei</i> |
| A3. O bebê consegue juntar as mãos e segurar um brinquedinho?                           | (   ) <i>Sim</i> | (   ) <i>Não</i> | (   ) <i>Não sei</i> |
| A4. O bebê reage a sons?                                                                | (   ) <i>Sim</i> | (   ) <i>Não</i> | (   ) <i>Não sei</i> |
| A5. Quando você sorri e conversa com a criança, ela responde com sorriso e sons?        | (   ) <i>Sim</i> | (   ) <i>Não</i> | (   ) <i>Não sei</i> |
| A6. A criança tenta conversar com você?                                                 | (   ) <i>Sim</i> | (   ) <i>Não</i> | (   ) <i>Não sei</i> |
| A7. A criança fixa e acompanha o seu rosto com o olhar?                                 | (   ) <i>Sim</i> | (   ) <i>Não</i> | (   ) <i>Não sei</i> |
| A8. A criança procura o seu olhar?                                                      | (   ) <i>Sim</i> | (   ) <i>Não</i> | (   ) <i>Não sei</i> |
| A9. É difícil acalmar a criança quando está chorando, mesmo quando você a pega no colo? | (   ) <i>Sim</i> | (   ) <i>Não</i> | (   ) <i>Não sei</i> |

### FORMULÁRIO B – CRIANÇAS DE 7 A 9 MESES

|                                                                                         |                  |                  |                      |
|-----------------------------------------------------------------------------------------|------------------|------------------|----------------------|
| B1. Quando deitada, a criança consegue se virar completamente?                          | (   ) <i>Sim</i> | (   ) <i>Não</i> | (   ) <i>Não sei</i> |
| B2. A criança passa um brinquedo ou objeto de uma mão para a outra?                     | (   ) <i>Sim</i> | (   ) <i>Não</i> | (   ) <i>Não sei</i> |
| B3. A criança consegue ficar sentada sem apoio das mãos para se equilibrar?             | (   ) <i>Sim</i> | (   ) <i>Não</i> | (   ) <i>Não sei</i> |
| B4. A criança imita os sons que você faz quando conversa com ela?                       | (   ) <i>Sim</i> | (   ) <i>Não</i> | (   ) <i>Não sei</i> |
| B5. A criança localiza sons?                                                            | (   ) <i>Sim</i> | (   ) <i>Não</i> | (   ) <i>Não sei</i> |
| B6. Quando um objeto cai no chão, a criança procura com o olhar?                        | (   ) <i>Sim</i> | (   ) <i>Não</i> | (   ) <i>Não sei</i> |
| B7. É difícil acalmar a criança quando está chorando, mesmo quando você a pega no colo? | (   ) <i>Sim</i> | (   ) <i>Não</i> | (   ) <i>Não sei</i> |
| B8. A criança mostra quando gosta ou não de alguma coisa?                               | (   ) <i>Sim</i> | (   ) <i>Não</i> | (   ) <i>Não sei</i> |
| B9. A criança aceita alimentos pastosos ou em pedaços?                                  | (   ) <i>Sim</i> | (   ) <i>Não</i> | (   ) <i>Não sei</i> |

### FORMULÁRIO C – CRIANÇAS DE 10 A 12 MESES

|                                                                          |                  |                  |                      |
|--------------------------------------------------------------------------|------------------|------------------|----------------------|
| C1. A criança consegue se levantar se apoiando/segurando em algum lugar? | (   ) <i>Sim</i> | (   ) <i>Não</i> | (   ) <i>Não sei</i> |
| C2. A criança consegue pegar objetos pequenos com polegar e o indicador? | (   ) <i>Sim</i> | (   ) <i>Não</i> | (   ) <i>Não sei</i> |
| C3. A criança consegue dar alguns passos com apoio?                      | (   ) <i>Sim</i> | (   ) <i>Não</i> | (   ) <i>Não sei</i> |
| C4. A criança chama "mama" ou "papa" ou nome parecido?                   | (   ) <i>Sim</i> | (   ) <i>Não</i> | (   ) <i>Não sei</i> |
| C5. A criança entende pedidos como "Venha cá" ou "Me dá o brinquedo"?    | (   ) <i>Sim</i> | (   ) <i>Não</i> | (   ) <i>Não sei</i> |

|                                                                                          |                |                |                    |
|------------------------------------------------------------------------------------------|----------------|----------------|--------------------|
| C6. A criança olha para você quando você a chama pelo nome?                              | ( ) <i>Sim</i> | ( ) <i>Não</i> | ( ) <i>Não sei</i> |
| C7. A criança brinca de esconde-achou?                                                   | ( ) <i>Sim</i> | ( ) <i>Não</i> | ( ) <i>Não sei</i> |
| C8. A criança imita quando você bate palmas ou dá tchau?                                 | ( ) <i>Sim</i> | ( ) <i>Não</i> | ( ) <i>Não sei</i> |
| C9. A criança estranha pessoas desconhecidas para ela?                                   | ( ) <i>Sim</i> | ( ) <i>Não</i> | ( ) <i>Não sei</i> |
| C10. É difícil acalmar a criança quando está chorando, mesmo quando você a pega no colo? | ( ) <i>Sim</i> | ( ) <i>Não</i> | ( ) <i>Não sei</i> |
| C11. A criança mostra quando gosta ou não de alguma coisa?                               | ( ) <i>Sim</i> | ( ) <i>Não</i> | ( ) <i>Não sei</i> |
| C12. A criança pede colo para pessoas conhecidas?                                        | ( ) <i>Sim</i> | ( ) <i>Não</i> | ( ) <i>Não sei</i> |

### FORMULÁRIO D – CRIANÇAS DE 13 A 15 MESES

|                                                                                                                                                                                |                |                |                    |
|--------------------------------------------------------------------------------------------------------------------------------------------------------------------------------|----------------|----------------|--------------------|
| D1. A criança pega alimentos com a mão e coloca na boca?                                                                                                                       | ( ) <i>Sim</i> | ( ) <i>Não</i> | ( ) <i>Não sei</i> |
| D2. A criança anda com ajuda ou apoiada em algum objeto?                                                                                                                       | ( ) <i>Sim</i> | ( ) <i>Não</i> | ( ) <i>Não sei</i> |
| D3. A criança emite sons como se estivesse conversando, mesmo que não dê para entender o que ela fala?                                                                         | ( ) <i>Sim</i> | ( ) <i>Não</i> | ( ) <i>Não sei</i> |
| D4. A criança fala mama ou papa ou outras palavras que você entende?                                                                                                           | ( ) <i>Sim</i> | ( ) <i>Não</i> | ( ) <i>Não sei</i> |
| D5. A criança olha para você quando você a chama pelo nome?                                                                                                                    | ( ) <i>Sim</i> | ( ) <i>Não</i> | ( ) <i>Não sei</i> |
| D6. A criança indica o que quer sem que seja pelo choro, podendo ser com palavras ou sons, apontando ou estendendo a mão para alcançar?                                        | ( ) <i>Sim</i> | ( ) <i>Não</i> | ( ) <i>Não sei</i> |
| D7. A criança coloca um ou mais objetos em uma caneca/pote se você pedir ou mostrar a ela como se faz?                                                                         | ( ) <i>Sim</i> | ( ) <i>Não</i> | ( ) <i>Não sei</i> |
| D8. A criança faz coisas que você pede como "Venha cá" ou "Me dá o brinquedo"?                                                                                                 | ( ) <i>Sim</i> | ( ) <i>Não</i> | ( ) <i>Não sei</i> |
| D9. A criança faz gestos quando você pede para ela? (por exemplo: dar tchau, bater palma, etc).                                                                                | ( ) <i>Sim</i> | ( ) <i>Não</i> | ( ) <i>Não sei</i> |
| D10. A criança mostra quando gosta ou não de alguma coisa?                                                                                                                     | ( ) <i>Sim</i> | ( ) <i>Não</i> | ( ) <i>Não sei</i> |
| D11. É fácil para a criança lidar com as mudanças na rotina do dia a dia? (ex: ter horários para dormir, brincar e comer)                                                      | ( ) <i>Sim</i> | ( ) <i>Não</i> | ( ) <i>Não sei</i> |
| D12. A criança obedece algumas regras de comportamento? Como por exemplo, evitar situações de perigo (não por o dedo na tomada ou não mexer em objetos que não tem permissão). | ( ) <i>Sim</i> | ( ) <i>Não</i> | ( ) <i>Não sei</i> |
| D13. Quando irritada é fácil a criança se acalmar?                                                                                                                             | ( ) <i>Sim</i> | ( ) <i>Não</i> | ( ) <i>Não sei</i> |
| D14. A criança se irrita com facilidade?                                                                                                                                       | ( ) <i>Sim</i> | ( ) <i>Não</i> | ( ) <i>Não sei</i> |
| D15. É difícil colocar a criança para dormir?                                                                                                                                  | ( ) <i>Sim</i> | ( ) <i>Não</i> | ( ) <i>Não sei</i> |

### FORMULÁRIO E – CRIANÇAS DE 16 A 18 MESES

|                                                                            |                |                |                    |
|----------------------------------------------------------------------------|----------------|----------------|--------------------|
| E1. A criança chuta uma bola?                                              | ( ) <i>Sim</i> | ( ) <i>Não</i> | ( ) <i>Não sei</i> |
| E2. A criança anda sem apoio?                                              | ( ) <i>Sim</i> | ( ) <i>Não</i> | ( ) <i>Não sei</i> |
| E3. A criança sobe um degrau sem ajuda de uma pessoa, mas se apoiando?     | ( ) <i>Sim</i> | ( ) <i>Não</i> | ( ) <i>Não sei</i> |
| E4. Quando a criança pega um lápis, ela faz rabisco no papel?              | ( ) <i>Sim</i> | ( ) <i>Não</i> | ( ) <i>Não sei</i> |
| E5. A criança fala pelo menos 10 palavras que você entende o significado?  | ( ) <i>Sim</i> | ( ) <i>Não</i> | ( ) <i>Não sei</i> |
| E6. A criança compreende o que as pessoas falam para ela?                  | ( ) <i>Sim</i> | ( ) <i>Não</i> | ( ) <i>Não sei</i> |
| E7. A criança consegue colocar um brinquedo ou um objeto em cima do outro? | ( ) <i>Sim</i> | ( ) <i>Não</i> | ( ) <i>Não sei</i> |

|                                                                                                                                                                               |                |                |                    |
|-------------------------------------------------------------------------------------------------------------------------------------------------------------------------------|----------------|----------------|--------------------|
| E8. A criança olha para você quando você a chama pelo nome?                                                                                                                   | ( ) <i>Sim</i> | ( ) <i>Não</i> | ( ) <i>Não sei</i> |
| E9. A criança gosta de brincar com objetos usados pela mãe ou pelo pai?                                                                                                       | ( ) <i>Sim</i> | ( ) <i>Não</i> | ( ) <i>Não sei</i> |
| E10. A criança obedece algumas regras de comportamento? Por exemplo, evitar situações de perigo (não colocar o dedo na tomada ou não mexer em objetos que não tem permissão). | ( ) <i>Sim</i> | ( ) <i>Não</i> | ( ) <i>Não sei</i> |
| E11. A criança brinca com brinquedos sem somente colocá-los na boca, balançá-los ou jogá-los no chão?                                                                         | ( ) <i>Sim</i> | ( ) <i>Não</i> | ( ) <i>Não sei</i> |
| E12. A criança olha nos seus olhos por mais de 1 ou 2 segundos?                                                                                                               | ( ) <i>Sim</i> | ( ) <i>Não</i> | ( ) <i>Não sei</i> |
| E13. A criança parece não gostar de muito barulho, por exemplo, tapando os ouvidos?                                                                                           | ( ) <i>Sim</i> | ( ) <i>Não</i> | ( ) <i>Não sei</i> |
| E14. A criança tenta chamar a sua atenção para o que ela está fazendo?                                                                                                        | ( ) <i>Sim</i> | ( ) <i>Não</i> | ( ) <i>Não sei</i> |
| E15. A criança usa palavras para pedir ajuda?                                                                                                                                 | ( ) <i>Sim</i> | ( ) <i>Não</i> | ( ) <i>Não sei</i> |
| E16. A criança se irrita com facilidade?                                                                                                                                      | ( ) <i>Sim</i> | ( ) <i>Não</i> | ( ) <i>Não sei</i> |
| E17. É fácil para a criança lidar com mudanças nas rotinas do dia a dia? (ex: ter horário para dormir, brincar e comer)                                                       | ( ) <i>Sim</i> | ( ) <i>Não</i> | ( ) <i>Não sei</i> |
| E18. É difícil colocar a criança para dormir?                                                                                                                                 | ( ) <i>Sim</i> | ( ) <i>Não</i> | ( ) <i>Não sei</i> |

### FORMULÁRIO F – CRIANÇAS DE 19 A 24 MESES

|                                                                                                                                                                                    |                |                |                    |
|------------------------------------------------------------------------------------------------------------------------------------------------------------------------------------|----------------|----------------|--------------------|
| F1. A criança sobe escadas sem nenhuma ajuda?                                                                                                                                      | ( ) <i>Sim</i> | ( ) <i>Não</i> | ( ) <i>Não sei</i> |
| F2. Quando a criança pega um lápis, ela faz rabisco no papel?                                                                                                                      | ( ) <i>Sim</i> | ( ) <i>Não</i> | ( ) <i>Não sei</i> |
| F3. A criança fala duas ou mais palavras juntas como “dá água” ou “me dá”?                                                                                                         | ( ) <i>Sim</i> | ( ) <i>Não</i> | ( ) <i>Não sei</i> |
| F4. A criança olha para você quando você a chama pelo nome?                                                                                                                        | ( ) <i>Sim</i> | ( ) <i>Não</i> | ( ) <i>Não sei</i> |
| F5. A criança olha se você mostra alguma coisa do outro lado da sala?                                                                                                              | ( ) <i>Sim</i> | ( ) <i>Não</i> | ( ) <i>Não sei</i> |
| F6. A criança brinca de faz-de-conta, por exemplo, falar ao telefone ou dar de comer a uma boneca, etc?                                                                            | ( ) <i>Sim</i> | ( ) <i>Não</i> | ( ) <i>Não sei</i> |
| F7. A criança indica o que quer sem chorar, com palavras ou sons, apontando para o que quer alcançar?                                                                              | ( ) <i>Sim</i> | ( ) <i>Não</i> | ( ) <i>Não sei</i> |
| F8. A criança gosta de brincar com objetos usados pela mãe ou pelo pai?                                                                                                            | ( ) <i>Sim</i> | ( ) <i>Não</i> | ( ) <i>Não sei</i> |
| F9. A criança brinca com brinquedos sem somente colocá-los na boca, balançá-los ou jogá-los no chão?                                                                               | ( ) <i>Sim</i> | ( ) <i>Não</i> | ( ) <i>Não sei</i> |
| F10. A criança obedece algumas regras de comportamento? Como por exemplo, evitar situações de perigo (não colocar o dedo na tomada ou não mexer em objetos que não tem permissão). | ( ) <i>Sim</i> | ( ) <i>Não</i> | ( ) <i>Não sei</i> |
| F11. A criança parece não gostar de muito barulho, por exemplo, tapando os ouvidos?                                                                                                | ( ) <i>Sim</i> | ( ) <i>Não</i> | ( ) <i>Não sei</i> |
| F12. A criança sorri como resposta ao seu olhar ou ao seu sorriso?                                                                                                                 | ( ) <i>Sim</i> | ( ) <i>Não</i> | ( ) <i>Não sei</i> |
| F13. A criança tem alguma mania ou faz movimentos estranhos com as mãos/dedos?                                                                                                     | ( ) <i>Sim</i> | ( ) <i>Não</i> | ( ) <i>Não sei</i> |
| F14. A criança tenta chamar a sua atenção para o que ela está fazendo?                                                                                                             | ( ) <i>Sim</i> | ( ) <i>Não</i> | ( ) <i>Não sei</i> |
| F15. Alguma vez você pensou que a criança é surda?                                                                                                                                 | ( ) <i>Sim</i> | ( ) <i>Não</i> | ( ) <i>Não sei</i> |
| F16. Quando irritada é fácil a criança se acalmar?                                                                                                                                 | ( ) <i>Sim</i> | ( ) <i>Não</i> | ( ) <i>Não sei</i> |

|                                                                                                                          |                |                |                    |
|--------------------------------------------------------------------------------------------------------------------------|----------------|----------------|--------------------|
| F17. É fácil para a criança lidar com mudanças nas rotinas do dia a dia? (ex: ter horários para dormir, brincar e comer) | ( ) <i>Sim</i> | ( ) <i>Não</i> | ( ) <i>Não sei</i> |
| F18. É fácil para você manter a criança nas rotinas do dia a dia?                                                        | ( ) <i>Sim</i> | ( ) <i>Não</i> | ( ) <i>Não sei</i> |

### FORMULÁRIO G – CRIANÇAS DE 25 A 30 MESES

|                                                                                                                          |                |                |                    |
|--------------------------------------------------------------------------------------------------------------------------|----------------|----------------|--------------------|
| G1. A criança gosta de subir em objetos, como por exemplo, cadeiras, mesas?                                              | ( ) <i>Sim</i> | ( ) <i>Não</i> | ( ) <i>Não sei</i> |
| G2. A criança é capaz de tirar alguma peça de roupa com ajuda?                                                           | ( ) <i>Sim</i> | ( ) <i>Não</i> | ( ) <i>Não sei</i> |
| G3. Quando a criança pega um lápis, ela desenha linhas no papel, sem ser somente rabisco?                                | ( ) <i>Sim</i> | ( ) <i>Não</i> | ( ) <i>Não sei</i> |
| G4. A criança indica o que quer sem chorar, com palavras ou sons, apontando para o que quer alcançar?                    | ( ) <i>Sim</i> | ( ) <i>Não</i> | ( ) <i>Não sei</i> |
| G5. A criança fala o nome de pelo menos 5 partes do corpo como nariz, mão ou barriga?                                    | ( ) <i>Sim</i> | ( ) <i>Não</i> | ( ) <i>Não sei</i> |
| G6. A criança compreende o que as pessoas falam para ela?                                                                | ( ) <i>Sim</i> | ( ) <i>Não</i> | ( ) <i>Não sei</i> |
| G7. A criança fala com outras pessoas e é compreendida a maior parte do tempo?                                           | ( ) <i>Sim</i> | ( ) <i>Não</i> | ( ) <i>Não sei</i> |
| G8. A criança reconhece e aponta corretamente objetos ou uma figura quando colocada à sua frente?                        | ( ) <i>Sim</i> | ( ) <i>Não</i> | ( ) <i>Não sei</i> |
| G9. A criança olha para você quando você a chama pelo nome?                                                              | ( ) <i>Sim</i> | ( ) <i>Não</i> | ( ) <i>Não sei</i> |
| G10. A criança sabe dizer o nome dela?                                                                                   | ( ) <i>Sim</i> | ( ) <i>Não</i> | ( ) <i>Não sei</i> |
| G11. A criança parece não gostar de muito barulho, por exemplo, tapando os ouvidos?                                      | ( ) <i>Sim</i> | ( ) <i>Não</i> | ( ) <i>Não sei</i> |
| G12. A criança sorri como resposta ao seu olhar ou ao seu sorriso?                                                       | ( ) <i>Sim</i> | ( ) <i>Não</i> | ( ) <i>Não sei</i> |
| G13. A criança tem alguma mania ou faz movimentos estranhos com as mãos/dedos?                                           | ( ) <i>Sim</i> | ( ) <i>Não</i> | ( ) <i>Não sei</i> |
| G14. Você alguma vez achou que a criança é surda?                                                                        | ( ) <i>Sim</i> | ( ) <i>Não</i> | ( ) <i>Não sei</i> |
| G15. A criança se interessa em brincar com outras crianças?                                                              | ( ) <i>Sim</i> | ( ) <i>Não</i> | ( ) <i>Não sei</i> |
| G16. É fácil para a criança lidar com mudanças nas rotinas do dia a dia? (ex: ter horários para dormir, brincar e comer) | ( ) <i>Sim</i> | ( ) <i>Não</i> | ( ) <i>Não sei</i> |
| G17. Quando irritada é fácil a criança se acalmar?                                                                       | ( ) <i>Sim</i> | ( ) <i>Não</i> | ( ) <i>Não sei</i> |
| G18. É fácil para você sair com a criança e ir em locais públicos? Ela costuma se comportar bem?                         | ( ) <i>Sim</i> | ( ) <i>Não</i> | ( ) <i>Não sei</i> |
| G19. A criança é muito agressiva?                                                                                        | ( ) <i>Sim</i> | ( ) <i>Não</i> | ( ) <i>Não sei</i> |

### FORMULÁRIO H – CRIANÇAS DE 31 A 36 MESES

|                                                                                                     |                |                |                    |
|-----------------------------------------------------------------------------------------------------|----------------|----------------|--------------------|
| H1. A criança joga bola para o alto acima da cabeça?                                                | ( ) <i>Sim</i> | ( ) <i>Não</i> | ( ) <i>Não sei</i> |
| H2. A criança lava e seca as mãos sem ajuda? (a criança não precisa abrir a torneira).              | ( ) <i>Sim</i> | ( ) <i>Não</i> | ( ) <i>Não sei</i> |
| H3. A criança tenta vestir alguma peça de roupa como: cueca, calcinha, meias, sapatos, casaco, etc? | ( ) <i>Sim</i> | ( ) <i>Não</i> | ( ) <i>Não sei</i> |
| H4. A criança dá passos para traz?                                                                  | ( ) <i>Sim</i> | ( ) <i>Não</i> | ( ) <i>Não sei</i> |
| H5. A criança desenha formas simples como um círculo?                                               | ( ) <i>Sim</i> | ( ) <i>Não</i> | ( ) <i>Não sei</i> |
| H6. A criança fala com outras pessoas e é compreendida na maior parte do tempo?                     | ( ) <i>Sim</i> | ( ) <i>Não</i> | ( ) <i>Não sei</i> |
| H7. A criança compreende o que as pessoas falam para ela?                                           | ( ) <i>Sim</i> | ( ) <i>Não</i> | ( ) <i>Não sei</i> |
| H8. A criança fala frases com 3 palavras ou mais?                                                   | ( ) <i>Sim</i> | ( ) <i>Não</i> | ( ) <i>Não sei</i> |

|                                                                                                                          |                |                |                    |
|--------------------------------------------------------------------------------------------------------------------------|----------------|----------------|--------------------|
| H9. A criança brinca de faz-de-conta, por exemplo, falar ao telefone ou dar de comer a uma boneca, etc?                  | ( ) <i>Sim</i> | ( ) <i>Não</i> | ( ) <i>Não sei</i> |
| H10. Se você mostrar figuras de animais, a criança reconhece corretamente “quem mia”? “quem late”?                       | ( ) <i>Sim</i> | ( ) <i>Não</i> | ( ) <i>Não sei</i> |
| H11. A criança sabe dizer o nome dela?                                                                                   | ( ) <i>Sim</i> | ( ) <i>Não</i> | ( ) <i>Não sei</i> |
| H12. A criança parece não gostar de muito barulho, por exemplo, tapando os ouvidos?                                      | ( ) <i>Sim</i> | ( ) <i>Não</i> | ( ) <i>Não sei</i> |
| H13. Alguma vez você pensou que a criança é surda?                                                                       | ( ) <i>Sim</i> | ( ) <i>Não</i> | ( ) <i>Não sei</i> |
| H14. A criança tem alguma mania ou faz movimentos estranhos com as mãos/dedos?                                           | ( ) <i>Sim</i> | ( ) <i>Não</i> | ( ) <i>Não sei</i> |
| H15. A criança se interessa em brincar com outras crianças?                                                              | ( ) <i>Sim</i> | ( ) <i>Não</i> | ( ) <i>Não sei</i> |
| H16. A criança fala alguma coisa para chamar atenção das pessoas para o que ela está fazendo?                            | ( ) <i>Sim</i> | ( ) <i>Não</i> | ( ) <i>Não sei</i> |
| H17. É fácil para a criança lidar com mudanças nas rotinas do dia a dia? (ex: ter horários para dormir, brincar e comer) | ( ) <i>Sim</i> | ( ) <i>Não</i> | ( ) <i>Não sei</i> |
| H18. Quando irritada é fácil a criança se acalmar sozinha?                                                               | ( ) <i>Sim</i> | ( ) <i>Não</i> | ( ) <i>Não sei</i> |
| H19. É fácil para você sair com a criança e ir em locais públicos? Ela costuma se comportar bem?                         | ( ) <i>Sim</i> | ( ) <i>Não</i> | ( ) <i>Não sei</i> |
| H20. É fácil para você manter a criança nas rotinas do dia a dia?                                                        | ( ) <i>Sim</i> | ( ) <i>Não</i> | ( ) <i>Não sei</i> |
| H21. A criança é muito agressiva?                                                                                        | ( ) <i>Sim</i> | ( ) <i>Não</i> | ( ) <i>Não sei</i> |

### FORMULÁRIO I – CRIANÇAS DE 37 A 48 MESES

|                                                                                                                         |                |                |                    |
|-------------------------------------------------------------------------------------------------------------------------|----------------|----------------|--------------------|
| I1. A criança pula de um degrau?                                                                                        | ( ) <i>Sim</i> | ( ) <i>Não</i> | ( ) <i>Não sei</i> |
| I2. A criança lava e seca as mãos sem ajuda? (A criança não precisa abrir a torneira)                                   | ( ) <i>Sim</i> | ( ) <i>Não</i> | ( ) <i>Não sei</i> |
| I3. A criança consegue vestir alguma peça de roupa sem ajuda? (ex: cueca ou calcinha, meias, sapatos, casaco, etc)      | ( ) <i>Sim</i> | ( ) <i>Não</i> | ( ) <i>Não sei</i> |
| I4. A criança desenha formas simples como um círculo e quadrado?                                                        | ( ) <i>Sim</i> | ( ) <i>Não</i> | ( ) <i>Não sei</i> |
| I5. A criança fala com outras pessoas e é compreendida na maior parte do tempo?                                         | ( ) <i>Sim</i> | ( ) <i>Não</i> | ( ) <i>Não sei</i> |
| I6. A criança conta histórias de um livro ou TV?                                                                        | ( ) <i>Sim</i> | ( ) <i>Não</i> | ( ) <i>Não sei</i> |
| I7. A criança faz perguntas como “por que” ou “como”?                                                                   | ( ) <i>Sim</i> | ( ) <i>Não</i> | ( ) <i>Não sei</i> |
| I8. A criança se interessa em brincar com outras crianças?                                                              | ( ) <i>Sim</i> | ( ) <i>Não</i> | ( ) <i>Não sei</i> |
| I9. A criança é muito medrosa ou muito nervosa, de forma exagerada?                                                     | ( ) <i>Sim</i> | ( ) <i>Não</i> | ( ) <i>Não sei</i> |
| I10. A criança parece triste ou infeliz?                                                                                | ( ) <i>Sim</i> | ( ) <i>Não</i> | ( ) <i>Não sei</i> |
| I11. É fácil para a criança lidar com mudanças nas rotinas do dia a dia? (ex: ter horário para dormir, brincar e comer) | ( ) <i>Sim</i> | ( ) <i>Não</i> | ( ) <i>Não sei</i> |
| I12. A criança muitas vezes quebra coisas de propósito?                                                                 | ( ) <i>Sim</i> | ( ) <i>Não</i> | ( ) <i>Não sei</i> |
| I13. A criança é muito agressiva?                                                                                       | ( ) <i>Sim</i> | ( ) <i>Não</i> | ( ) <i>Não sei</i> |
| I14. A criança é muito inquieta ou incapaz de ficar sentada?                                                            | ( ) <i>Sim</i> | ( ) <i>Não</i> | ( ) <i>Não sei</i> |
| I15. É fácil para você sair com a criança e ir em locais públicos? Ela costuma se comportar bem?                        | ( ) <i>Sim</i> | ( ) <i>Não</i> | ( ) <i>Não sei</i> |
| I16. É fácil para você fazer a criança te obedecer?                                                                     | ( ) <i>Sim</i> | ( ) <i>Não</i> | ( ) <i>Não sei</i> |
| I17. A criança tem dificuldades para prestar atenção?                                                                   | ( ) <i>Sim</i> | ( ) <i>Não</i> | ( ) <i>Não sei</i> |

### FORMULÁRIO J – CRIANÇAS DE 49 A 59 MESES

|                                                                      |                |                |                    |
|----------------------------------------------------------------------|----------------|----------------|--------------------|
| J1. A criança consegue pegar uma bola quando você joga?              | ( ) <i>Sim</i> | ( ) <i>Não</i> | ( ) <i>Não sei</i> |
| J2. A criança pula com um pé só?                                     | ( ) <i>Sim</i> | ( ) <i>Não</i> | ( ) <i>Não sei</i> |
| J3. A criança consegue se vestir sem ajuda? (Qualquer peça de roupa) | ( ) <i>Sim</i> | ( ) <i>Não</i> | ( ) <i>Não sei</i> |
| J4. A criança desenha figuras que você reconhece?                    | ( ) <i>Sim</i> | ( ) <i>Não</i> | ( ) <i>Não sei</i> |

|                                                                                                                          |                                         |                                         |                                             |
|--------------------------------------------------------------------------------------------------------------------------|-----------------------------------------|-----------------------------------------|---------------------------------------------|
| J5. A criança pinta um desenho dentro das linhas?                                                                        | ( <input type="checkbox"/> ) <i>Sim</i> | ( <input type="checkbox"/> ) <i>Não</i> | ( <input type="checkbox"/> ) <i>Não sei</i> |
| J6. A criança fala com outras pessoas e é compreendida na maior parte do tempo?                                          | ( <input type="checkbox"/> ) <i>Sim</i> | ( <input type="checkbox"/> ) <i>Não</i> | ( <input type="checkbox"/> ) <i>Não sei</i> |
| J7. A criança conta histórias ou alguma coisa que aconteceu?                                                             | ( <input type="checkbox"/> ) <i>Sim</i> | ( <input type="checkbox"/> ) <i>Não</i> | ( <input type="checkbox"/> ) <i>Não sei</i> |
| J8. A criança sabe contar até 10?                                                                                        | ( <input type="checkbox"/> ) <i>Sim</i> | ( <input type="checkbox"/> ) <i>Não</i> | ( <input type="checkbox"/> ) <i>Não sei</i> |
| J9. A criança compara coisas usando palavras como “maior” ou “menor”?                                                    | ( <input type="checkbox"/> ) <i>Sim</i> | ( <input type="checkbox"/> ) <i>Não</i> | ( <input type="checkbox"/> ) <i>Não sei</i> |
| J10. A criança usa palavras como “ontem” e “amanhã” corretamente?                                                        | ( <input type="checkbox"/> ) <i>Sim</i> | ( <input type="checkbox"/> ) <i>Não</i> | ( <input type="checkbox"/> ) <i>Não sei</i> |
| J11. A criança segue orientações simples sobre como fazer algo?                                                          | ( <input type="checkbox"/> ) <i>Sim</i> | ( <input type="checkbox"/> ) <i>Não</i> | ( <input type="checkbox"/> ) <i>Não sei</i> |
| J12. A criança consegue fazer sozinha as coisas que você pede?                                                           | ( <input type="checkbox"/> ) <i>Sim</i> | ( <input type="checkbox"/> ) <i>Não</i> | ( <input type="checkbox"/> ) <i>Não sei</i> |
| J13. A criança se dá bem com outras crianças?                                                                            | ( <input type="checkbox"/> ) <i>Sim</i> | ( <input type="checkbox"/> ) <i>Não</i> | ( <input type="checkbox"/> ) <i>Não sei</i> |
| J14. A criança presta atenção ou se concentra quando estão falando com ela ou quando ela está em alguma atividade?       | ( <input type="checkbox"/> ) <i>Sim</i> | ( <input type="checkbox"/> ) <i>Não</i> | ( <input type="checkbox"/> ) <i>Não sei</i> |
| J15. A criança consegue dormir algumas noites sem fazer xixi na cama?                                                    | ( <input type="checkbox"/> ) <i>Sim</i> | ( <input type="checkbox"/> ) <i>Não</i> | ( <input type="checkbox"/> ) <i>Não sei</i> |
| J16. A criança parece muito medrosa ou muito nervosa, de forma exagerada?                                                | ( <input type="checkbox"/> ) <i>Sim</i> | ( <input type="checkbox"/> ) <i>Não</i> | ( <input type="checkbox"/> ) <i>Não sei</i> |
| J17. A criança parece triste ou infeliz?                                                                                 | ( <input type="checkbox"/> ) <i>Sim</i> | ( <input type="checkbox"/> ) <i>Não</i> | ( <input type="checkbox"/> ) <i>Não sei</i> |
| J18. É fácil para a criança lidar com mudanças nas rotinas do dia a dia? (ex: ter horários para dormir, brincar e comer) | ( <input type="checkbox"/> ) <i>Sim</i> | ( <input type="checkbox"/> ) <i>Não</i> | ( <input type="checkbox"/> ) <i>Não sei</i> |
| J19. A criança muitas vezes quebra coisas de propósito?                                                                  | ( <input type="checkbox"/> ) <i>Sim</i> | ( <input type="checkbox"/> ) <i>Não</i> | ( <input type="checkbox"/> ) <i>Não sei</i> |
| J20. A criança é muito agressiva?                                                                                        | ( <input type="checkbox"/> ) <i>Sim</i> | ( <input type="checkbox"/> ) <i>Não</i> | ( <input type="checkbox"/> ) <i>Não sei</i> |
| J21. A criança é muito inquieta ou incapaz de ficar sentada?                                                             | ( <input type="checkbox"/> ) <i>Sim</i> | ( <input type="checkbox"/> ) <i>Não</i> | ( <input type="checkbox"/> ) <i>Não sei</i> |
| J22. É fácil para você sair com a criança e ir em locais públicos? Ela costuma se comportar bem?                         | ( <input type="checkbox"/> ) <i>Sim</i> | ( <input type="checkbox"/> ) <i>Não</i> | ( <input type="checkbox"/> ) <i>Não sei</i> |
| J23. É fácil para você saber o que a criança quer?                                                                       | ( <input type="checkbox"/> ) <i>Sim</i> | ( <input type="checkbox"/> ) <i>Não</i> | ( <input type="checkbox"/> ) <i>Não sei</i> |
| J24. É fácil para você fazer a criança te obedecer?                                                                      | ( <input type="checkbox"/> ) <i>Sim</i> | ( <input type="checkbox"/> ) <i>Não</i> | ( <input type="checkbox"/> ) <i>Não sei</i> |
